# Supplementary material for: Screening and Identification of Transcription Factors Potentially Regulating Foxl2 Expression in Chlamys farreri Ovary
Source: MDPI journal article supplement (doi:10.3390/biology11010113), 2022-01-11
Supplement: s1 [file s1]

# Screening and identification of transcription factors regulating *Foxl2* high expression in *Chlamys farreri* ovary

Shutong Fan <sup>1</sup>, Xixi Li <sup>1</sup>, Siyu Lin <sup>1</sup>, Yunpeng Li <sup>1,2</sup>, Huixin Ma <sup>1</sup>, Zhifeng Zhang <sup>1,2,\*</sup> and Zhenkui Qin <sup>1\*</sup>

<sup>1</sup> Ministry of Education Key Laboratory of Marine Genetics and Breeding, College of Marine Life Sciences, Ocean University of China, Qingdao 266003, China

<sup>2</sup> Laboratory of Tropical Marine Germplasm Resources and Breeding Engineering, Sanya Oceanographic Institution, Ocean University of China, Sanya 572000, China

\* Corresponding author: qinzk@ouc.edu.cn; zzfp107@ouc.edu.cn

**Table S1.** Summary of primers used in this study

| Name                                                | Primer sequence (5'-3')                | fragment position (bp) | amplicon size (bp) |
|-----------------------------------------------------|----------------------------------------|------------------------|--------------------|
| For <i>Foxl2</i> promoter-LUC vector construction   |                                        |                        |                    |
| Fwd-1705                                            | <u>CTCGAG</u> GGCTTCATACACTAGAGGCG     | -1705 ~ +200           | 1905               |
| Rev+200                                             | <u>AAGCTT</u> ATTATCACCAAATCCCTCGG     |                        |                    |
| Fwd-1705                                            | <u>CTCGAG</u> ACTCCTCCGTTGATGTTGAC     | -1705 ~ +1             | 1706               |
| Rev+1                                               | <u>AAGCTT</u> ATTATCACCAAATCCCTCGG     |                        |                    |
| Fwd-1000                                            | <u>CTCGAG</u> AGAAACACAGAATCTTATCC     | -1000 ~ +1             | 1001               |
| Rev+1                                               | <u>AAGCTT</u> ATTATCACCAAATCCCTCGG     |                        |                    |
| Fwd-616                                             | <u>CTCGAG</u> ATACTCTGGTCCAAGTCCTG     | -616 ~ +1              | 617                |
| Rev+1                                               | <u>AAGCTT</u> ATTATCACCAAATCCCTCGG     |                        |                    |
| Universal sequencing primers for pGADT7-DEST vector |                                        |                        |                    |
| pGADT7-DEST-F                                       | TAATACGACTCACTATAGGGCGAGCGCCGCCATG     |                        |                    |
| pGADT7-DEST-R                                       | GTGAACTTGCGGGGTTTTTCAGTATCTACGATT      |                        |                    |
| For amplification of <i>Foxl2</i> bait sequence     |                                        |                        |                    |
| Y1H-5                                               | <u>AAGCTT</u> CCCTTGGGTCTGTTGTATTC     | -1000~-616             | 385                |
| Y1H-3                                               | <u>CTCGAG</u> GCGGATGTATGATGGGACGA     |                        |                    |
| For amplification of candidate factors CDS          |                                        |                        |                    |
| Vtg ORF-F                                           | CGCC <u>ATATG</u> ATGTTCCGATTCTGATGCTG |                        |                    |

|                      |                                          |
|----------------------|------------------------------------------|
| Vtg ORF-R            | CCG <u>CTCGAG</u> GCCCATACAAAGCCAAGC     |
| Cyp ORF-F            | CGCCATATGATGGGTGTACTAGAGGGGAT            |
| Cyp ORF-R            | CCG <u>CTCGAG</u> CATGGTGGGCCTCGCAATCA   |
| HSDL2 ORF-F          | CGCGGATCCTGTCCACACAATCCAGTAAT            |
| HSDL2 ORF-R          | CCG <u>CTCGAG</u> TTATCTCTTGACCCGGAATC   |
| Protein singed ORF-F | CGCGGATCCATGTGCGAGTCTAATGGATG            |
| Protein singed ORF-R | CCG <u>CTCGAG</u> TTAGAACTCCCAGTATGTAT   |
| CECR ORF-F           | CGCGGATCCTGGAGAGGAGGAATACTTTT            |
| CECR ORF-R           | CCG <u>CTCGAG</u> CATGTGCCACGCGGAAGTT    |
| YBX ORF-F            | CCGGAATTCATGTCCGATTCCGAAAAACA            |
| YBX ORF-R            | <u>CGAGCTC</u> TTACTCGGCCTGCTCGCCTC      |
| TRERF1 ORF-F         | CCGGAATTCACTGACTCTACCACAGGATT            |
| TRERF1 ORF-R         | <u>CGAGCTC</u> CATCTGTTGGATAATGTCTC      |
| Cf-Uf1 ORF-F         | CGCGGATCCATGTTGCGGAGACTGGCG              |
| Cf-Uf1 ORF-R         | CCGCCG <u>CTCGAG</u> TTTCCCAGTAATATAAGC  |
| Cf-Uf2 ORF-F         | CGCGGATCCAGGTACCTACTCATGGAGATCA          |
| Cf-Uf2 ORF-R         | CCG <u>CTCGAG</u> ACTAAGAAGTTCCAGGGCTGTA |
| Cf-Uf3 ORF-F         | CGCGGATCCGGGCCCCAACGACATTCT              |
| Cf-Uf3 ORF-R         | CCGCCG <u>CTCGAG</u> ACGGTGATTCTGCATAGT  |
| Cf-Uf4 ORF-F         | CGCGGATCCATGGTTCGTGTATTGTTCAGA           |
| Cf-Uf4 ORF-R         | CCG <u>CTCGAG</u> TCACGAAGCACACGTGACCT   |
| Cf-Uf5 ORF-F         | CGCGGATCCATGCATCGAGCGTACCAGCC            |
| Cf-Uf5 ORF-R         | CCG <u>CTCGAG</u> TCATGGTATGTACTCGAACG   |

For RT-qPCR of the candidate factors

|                                    |                        |
|------------------------------------|------------------------|
| <i>EF-1 <math>\alpha</math></i> -F | TTCCGAGTTCTATAATGGGTAA |
| <i>EF-1 <math>\alpha</math></i> -R | ACGCCACAGCTTATTTCTTC   |
| <i>Foxl2</i> -F                    | GTATCCGCCACAACCTCA     |
| <i>Foxl2</i> -R                    | CAGGGTCCAAAGTCCAGA     |
| <i>Vtg</i> -F                      | GGAACTACAACAAATGCGTGAA |
| <i>Vtg</i> -R                      | GGCTGTGTATAGATATGCTTG  |

|                          |                        |
|--------------------------|------------------------|
| <i>HSDL2</i> -F          | CAGCAAAGACAACAGAGCCACA |
| <i>HSDL2</i> -R          | CTTTCTCCACGGCTGATTGA   |
| <i>Protein singed</i> -F | ACGGTCACAGCAAAGATA     |
| <i>Protein singed</i> -R | TCACTATCCCTGTCCTGTT    |
| <i>CECR</i> -F           | CTGTCTGGGACTTATCTTTC   |
| <i>CECR</i> -R           | CAGCCTTGTCATAACTCCTA   |
| <i>YBX</i> -F            | TTTGTCCATCAGACTGCCATTA |
| <i>YBX</i> -R            | CCTTCCACGACATCAAACCTC  |
| <i>TRERF1</i> -F         | GGCCTCGTCATGTCGGGTCA   |
| <i>TRERF1</i> -R         | TGGTCAGTTAAGGCATACAC   |
| <i>Cf-Uf1</i> -F         | GTTGCGGAGACTGGCGAAGA   |
| <i>Cf-Uf1</i> -R         | GAAACGCCGTATGAGGGA     |
| <i>Cf-Uf2</i> -F         | GAAGGGCAAGCAGTG GTA    |
| <i>Cf-Uf2</i> -R         | TAGTCATTTCGTCCTTGC     |
| <i>Cf-Uf3</i> -F         | TAGTGCTGCGTTTGCCGTGAT  |
| <i>Cf-Uf3</i> -R         | ATCCCGATGTTTGTCCAG     |
| <i>Cf-Uf4</i> -F         | CGGGAGGTGATTGACCGAGAA  |
| <i>Cf-Uf4</i> -R         | TGATGACTGCGAGGACGA     |
| <i>Cf-Uf5</i> -F         | CGTACCAGCCGCTTACACCA   |
| <i>Cf-Uf5</i> -R         | AATCATTGGTTTGGCTCCGA   |

---

Restriction sites are underlined.

Table S2. Annotation of the positive insert sequences in yeast one-hybrid screening

| No    | Annotation information                                      | Number of clones |
|-------|-------------------------------------------------------------|------------------|
| Y1H1  | Protein singed                                              | 1                |
| Y1H2  | Cytochrome P450 1A1                                         | 2                |
| Y1H3  | Coiled-coil domain-containing protein 92                    | 1                |
| Y1H4  | Eukaryotic translation initiation factor 4E transporter     | 1                |
| Y1H5  | Proteasome subunit beta type-4                              | 1                |
| Y1H6  | Ependymin-related protein 1                                 | 1                |
| Y1H7  | Cytochrome c oxidase subunit 6A, mitochondrial              | 1                |
| Y1H8  | Transcription factor BTF3 homolog 4                         | 2                |
| Y1H9  | ADP, ATP carrier protein                                    | 1                |
| Y1H10 | Uncharacterized protein C17orf105 homolog                   | 1                |
| Y1H11 | Baculoviral IAP repeat-containing protein 1b                | 2                |
| Y1H12 | Ubiquinone biosynthesis protein COQ4 homolog, mitochondrial | 2                |
| Y1H13 | 10 kDa heat shock protein, mitochondrial                    | 1                |
| Y1H14 | Tubulin beta-4B chain                                       | 1                |
| Y1H15 | Proliferating cell nuclear antigen                          | 1                |
| Y1H16 | Probable G-protein coupled receptor 158                     | 1                |
| Y1H17 | evm.model.scaffold62981.1 (uncommented factor)              | 1                |
| Y1H18 | evm.model.scaffold64139.1 (uncommented factor)              | 1                |
| Y1H19 | evm.model.scaffold64813.41 (uncommented factor)             | 1                |
| Y1H20 | evm.model.scaffold64999.39 (uncommented factor)             | 1                |
| Y1H21 | evm.model.scaffold36483.59 (uncommented factor)             | 2                |
| Y1H22 | Vitellogenin-4                                              | 4 1              |
| Y1H23 | Guanine nucleotide-binding protein subunit beta-2-like 1    | 2 1              |
| Y1H24 | Tubulin alpha-1A chain                                      | 1 1              |
| Y1H25 | Tubulin alpha-1B chain                                      | 2 2              |
| Y1H26 | Ganglioside GM2 activator                                   | 1 3              |
| Y1H27 | Soma ferritin                                               | 1 1              |
| Y1H28 | ATP synthase lipid-binding protein, mitochondrial           | 4 1              |
| Y1H29 | Transcription initiation factor TFIID subunit 1             | 3 3              |
| Y1H30 | Y-box factor homolog                                        | 2 1              |
| Y1H31 | Transcriptional-regulating factor 1                         | 2 1              |

|       |                                                               |   |
|-------|---------------------------------------------------------------|---|
| Y1H32 | Nascent polypeptide-associated complex subunit alpha          | 2 |
| Y1H33 | Taurocyamine kinase                                           | 1 |
| Y1H34 | Hydroxyacyl-coenzyme A dehydrogenase, mitochondrial           | 1 |
| Y1H35 | Heterogeneous nuclear ribonucleoprotein Q                     | 1 |
| Y1H36 | Sin3 histone deacetylase corepressor complex component SDS3   | 1 |
| Y1H37 | Histone H2A.v                                                 | 2 |
| Y1H38 | UPF0368 protein Cxorf26 homolog                               | 1 |
| Y1H39 | Elongation factor 1-gamma                                     | 1 |
| Y1H40 | Elongation factor 1-alpha                                     | 4 |
| Y1H41 | Elongation factor 1-delta                                     | 2 |
| Y1H42 | Elongation factor 1-beta                                      | 1 |
| Y1H43 | Arginine/serine-rich protein PNISR                            | 1 |
| Y1H44 | Tyrosine-protein kinase BAZ1B                                 | 2 |
| Y1H45 | Hydroxysteroid dehydrogenase-like protein 2                   | 1 |
| Y1H46 | DNA-directed RNA polymerase II subunit RPB4                   | 1 |
| Y1H47 | Cat eye syndrome critical region protein 5                    | 1 |
| Y1H48 | Serine/arginine-rich splicing factor 4                        | 1 |
| Y1H49 | Alpha-ketoglutarate-dependent dioxygenase alkB homolog 4      | 1 |
| Y1H50 | NADH dehydrogenase [ubiquinone] flavoprotein 1, mitochondrial | 1 |
| Y1H51 | ATP synthase subunit beta, mitochondrial                      | 1 |
| Y1H52 | Glyceraldehyde-3-phosphate dehydrogenase                      | 1 |
| Y1H53 | Actin, cytoplasmic                                            | 2 |
| Y1H54 | Superoxide dismutase [Cu-Zn]                                  | 1 |
| Y1H55 | Mitotic apparatus protein p62                                 | 2 |
| Y1H56 | Metaxin-3                                                     | 1 |
| Y1H57 | IQ and ubiquitin-like domain-containing protein               | 1 |
| Y1H58 | RNA-binding protein 39                                        | 1 |
| Y1H59 | Protein translation factor SUI1 homolog                       | 1 |
| Y1H60 | Ornithine decarboxylase antizyme 1                            | 1 |
| Y1H61 | Zinc transporter ZIP11                                        | 1 |
| Y1H62 | evm.model.scaffold27357.23 (uncommented factor)               | 2 |
| Y1H63 | evm.model.scaffold61945.9 (uncommented factor)                | 1 |
| Y1H64 | evm.model.scaffold10699.59 (uncommented factor)               | 1 |

Blue filling, the first screening; Green filling, the second screening; Orange filling, the cotenant in two screenings:  
blue font, number of the positive clones in the first screening, green font, number of the positive clones in the second  
screening.

Table S3. Function and sex difference information of the candidate transcription factors

| No | Candidate transcription factors                 | Function                                                                                                                                       | Number of clones | LogFC   | FDR                      |
|----|-------------------------------------------------|------------------------------------------------------------------------------------------------------------------------------------------------|------------------|---------|--------------------------|
| 1  | Vitellogenin-4                                  | Lipid transport and storage; Antioxidant activity                                                                                              | 4 1              | -9.4367 | 3.49 x 10 <sup>-38</sup> |
| 2  | Cytochrome P450 1A1                             | Participates in the metabolism of various endogenous substrates, including fatty acids, steroid hormones, and vitamins                         | 1                | -7.4725 | 3.26 x 10 <sup>-3</sup>  |
| 3  | Hydroxysteroid dehydrogenase-like protein 2     | Participates in the physiological process of female sex differentiation and the generation and maintenance of secondary sexual characteristics | 1                | -7.3104 | 3.26 x 10 <sup>-47</sup> |
| 4  | Ganglioside GM2 activator                       | β -N-acetylgalactosidase activity; Lipid transporter activity                                                                                  | 1 3              | -5.8531 | 4 x 10 <sup>-9</sup>     |
| 5  | Mitotic apparatus protein p62                   | Participate in the mitotic process                                                                                                             | 2                | -5.1028 | 9.74 x 10 <sup>-33</sup> |
| 6  | Ependymin-related protein 1                     | Calcium binding                                                                                                                                | 1                | -5.0724 | 9.74 x 10 <sup>-19</sup> |
| 7  | Tubulin beta-4B chain                           | Tubulin is the main component of microtubules                                                                                                  | 1                | -4.5987 | 1.96 x 10 <sup>-40</sup> |
| 8  | Protein singed                                  | Acts as an actin binding protein; It is involved in setae and hair generation, cell differentiation and oogenesis                              | 1                | -3.2786 | 2.08 x 10 <sup>-14</sup> |
| 9  | Cat eye syndrome critical region protein 5      | Participates in ocular development through the formation of ISWI chromatin complexes                                                           | 1                | -3.0421 | 5.0 x 10 <sup>-99</sup>  |
| 10 | Actin, cytoplasmic                              | Cytoplasm: movement and contraction of cells; Nucleus: regulates gene transcription and movement and repair of damaged DNA                     | 2                | -2.8039 | 2.51 x 10 <sup>-13</sup> |
| 11 | Tubulin alpha-1A chain                          | Tubulin is the main component of microtubules                                                                                                  | 1 1              | -2.071  | 0                        |
| 12 | Probable G-protein coupled receptor 158         | A class of steroid or renal thyroid hormone receptors                                                                                          | 1                | -1.748  | 4.0 x 10 <sup>-70</sup>  |
| 13 | Tubulin alpha-1B chain                          | Tubulin is the main component of microtubules                                                                                                  | 2 2              | -1.3422 | 0                        |
| 14 | UPF0368 protein Cxorf26 homolog                 | -----                                                                                                                                          | 1                | -1.6638 | 8.0 x 10 <sup>-50</sup>  |
| 15 | Heterogeneous nuclear ribonucleoprotein Q       | Isomeric ribonucleic protein Q                                                                                                                 | 1                | -1.3273 | 3.04 x 10 <sup>-14</sup> |
| 16 | Cf-Uf5                                          | -----                                                                                                                                          | 1                | 8.2517  | 5.0 x 10 <sup>-22</sup>  |
| 17 | IQ and ubiquitin-like domain-containing protein | Participates in cilia formation and maintenance                                                                                                | 1                | 3.9183  | 0                        |
| 18 | Taurocyamine kinase                             | Catalyzes phosphate transfer between ATP and various phosphogens                                                                               | 1                | 3.3264  | 0                        |
| 19 | Coiled-coil domain-containing protein 92        | Participates in adipocyte differentiation                                                                                                      | 1                | 3.0652  | 3.0 x 10 <sup>-22</sup>  |
| 20 | Histone H2A.v                                   | Mutant histone H2A                                                                                                                             | 2                | 2.8607  | 1.0 x 10 <sup>-71</sup>  |
| 21 | Cytochrome c oxidase subunit 6A, mitochondrial  | Cytochrome C oxidase; Participating oxidative phosphorylation                                                                                  | 1                | 1.5183  | 7.0 x 10 <sup>-12</sup>  |

|    |                                                         |                                                                                                          |     |         |                          |
|----|---------------------------------------------------------|----------------------------------------------------------------------------------------------------------|-----|---------|--------------------------|
| 22 | Arginine/serine-rich protein PNISR                      | RNA binding                                                                                              | 1   | 1.1457  | 1.0 x 10 <sup>-25</sup>  |
| 23 | RNA-binding protein 39                                  | -----                                                                                                    | 1   | 1.2183  | 0                        |
| 24 | Transcriptional-regulating factor 1                     | Activation of <i>CYP11A1</i> transcription; It binds to the progesterone receptor                        | 2 1 | 1.1161  | 8.0 x 10 <sup>-49</sup>  |
| 25 | ATP synthase lipid-binding protein, mitochondrial       | Mitochondrial membrane ATP synthase                                                                      | 1   | 1.0899  | 3.0 x 10 <sup>-49</sup>  |
| 26 | 10 kDa heat shock protein, mitochondrial                | Chaperones are involved in the introduction of mitochondrial proteins and the assembly of macromolecules | 1   | -0.9827 | 8.0 x 10 <sup>-48</sup>  |
| 27 | Elongation factor 1-gamma                               | Translation extension factor activity                                                                    | 4   | -0.6051 | 4.0 x 10 <sup>-47</sup>  |
| 28 | Eukaryotic translation initiation factor 4E transporter | EIF4E binding protein regulates mRNA translation and stability in the processing body (p-body)           | 1   | -0.5465 | 1.0 x 10 <sup>-42</sup>  |
| 29 | Soma ferritin                                           | It has iron oxidase activity                                                                             | 1 1 | -0.3918 | 4.33 x 10 <sup>-5</sup>  |
| 30 | Y-box factor homolog                                    | Male gonadal development; Spermatogenesis                                                                | 2 1 | -0.3798 | 0                        |
| 31 | Superoxide dismutase [Cu-Zn]                            | Destroy free radicals that are produced in cells and are toxic to biological systems                     | 1   | -0.3711 | 1.33 x 10 <sup>-9</sup>  |
| 32 | Tyrosine-protein kinase BAZ1B                           | Atypical tyrosine protein kinases                                                                        | 1   | -0.3434 | 0                        |
| 33 | DNA-directed RNA polymerase II subunit RPB4             | A component of RNA polymerase II that catalyzes the transcription of DNA into RNA                        | 1   | -0.3092 | 2.0 x 10 <sup>-68</sup>  |
| 34 | Protein translation factor SUI1 homolog                 | Participate in the translation process                                                                   | 1   | 0.9665  | 3.0 x 10 <sup>-44</sup>  |
| 35 | Elongation factor 1-beta                                | Translation extension factor                                                                             | 1   | 0.9526  | 4.0 x 10 <sup>-89</sup>  |
| 36 | Arginine/serine-rich protein                            | -----                                                                                                    | 1   | 0.9389  | 1.0 x 10 <sup>-25</sup>  |
| 37 | Metaxin-3                                               | Participates in protein transport to mitochondria                                                        | 1   | 0.9206  | 2.0 x 10 <sup>-50</sup>  |
| 38 | Ornithine decarboxylase antizyme 1                      | Ornithine decarboxylase inhibitor activity                                                               | 1   | 0.9099  | 1.0 x 10 <sup>-33</sup>  |
| 39 | Glyceraldehyde-3-phosphate dehydrogenase                | It has the activity of glyceraldehyde 3-phosphate dehydrogenase and nitrosase                            | 1   | 0.9062  | 0                        |
| 40 | Proliferating cell nuclear antigen                      | Coprotein of DNA polymerase δ                                                                            | 1   | 0.8529  | 1.0 x 10 <sup>-146</sup> |
| 41 | Transcription initiation factor TFIIID subunit 1        | Major components of the TFIIID basic transcription factor complex                                        | 3 3 | 0.6598  | 0                        |
| 42 | Transcription factor BTF3 homolog 4                     | -----                                                                                                    | 2   | 0.6563  | 1.0 x 10 <sup>-71</sup>  |
| 43 | ADP, ATP carrier protein                                | Catalyze the exchange of cytoplasmic ADP and mitochondrial ATP across mitochondrial intima               | 1   | 0.6147  | 0                        |
| 44 | Nascent polypeptide-associated complex subunit alpha    | Participates in the synthesis of ribosome-new polypeptide complex                                        | 2   | 0.5489  | 6.0 x 10 <sup>-34</sup>  |



|    |                                                               |                                                                                                                                                                             |     |        |                          |
|----|---------------------------------------------------------------|-----------------------------------------------------------------------------------------------------------------------------------------------------------------------------|-----|--------|--------------------------|
| 45 | NADH dehydrogenase [ubiquinone] flavoprotein 1, mitochondrial | Core subunit of NADH dehydrogenase in mitochondrial membrane respiratory chain                                                                                              | 3   | 0.5461 | 1.0 x 10 <sup>-29</sup>  |
| 46 | Zinc transporter ZIP11                                        | Functions as a zinc transporter in cells and has zinc ion transmembrane transporter activity                                                                                | 1   | 0.5278 | 1.42 x 10 <sup>-6</sup>  |
| 47 | Ubiquinone biosynthesis protein COQ4 homolog, mitochondrial   | Coenzyme Q is a component of the biosynthetic pathway                                                                                                                       | 1   | 0.4178 | 2.0 x 10 <sup>-82</sup>  |
| 48 | Guanine nucleotide-binding protein subunit beta-2-like 1      | Components of the 40S ribosomal subunit are involved in translation inhibition                                                                                              | 2 1 | 0.2658 | 0                        |
| 49 | Alpha-ketoglutarate-dependent dioxygenase alkB homolog 4      | Protein demethylase                                                                                                                                                         | 1   | 0.1772 | 7.0 x 10 <sup>-76</sup>  |
| 50 | Serine/arginine-rich splicing factor 4                        | Splicing factors in their dephosphorylated form act as general repressors for pre-splicing mRNA                                                                             | 1   | 0.1142 | 3.0 x 10 <sup>-68</sup>  |
| 51 | Proteasome subunit beta type-4                                | Endopeptidase activity                                                                                                                                                      | 1   | 0      | 1.0 x 10 <sup>-111</sup> |
| 52 | Baculoviral IAP repeat-containing protein 1b                  | Cysteine type endopeptidase inhibitor activity is involved in apoptosis                                                                                                     | 1   | 0      | 8.0 x 10 <sup>-23</sup>  |
| 53 | Hydroxyacyl-coenzyme A dehydrogenase, mitochondrial           | Insulin secretion is controlled by inhibiting the activation of glutamate dehydrogenase 1, which plays an important role in regulating amino acid-induced insulin secretion | 1   | 0      | 1.0 x 10 <sup>-147</sup> |
| 54 | Sin3 histone deacetylase corepressor complex component SDS3   | Regulatory proteins that inhibit histone deacetylase 1 (HDAC1) transcription and enhance histone deacetylase activity                                                       | 1   | 0      | 1.0 x 10 <sup>-111</sup> |
| 55 | Elongation factor 1-alpha                                     | Translation extension factor                                                                                                                                                | 4   | 0      | 1.29 x 10 <sup>-3</sup>  |
| 56 | Elongation factor 1-delta                                     | Translation extension factor                                                                                                                                                | 2   | 0      | 1.0 x 10 <sup>-47</sup>  |

Blue font, number of clones in the first screening; Green font, number of clones in the second screening.

“-----“, detailed functions are not available.

Log FC=Log<sub>2</sub>(<sup>testis expression TPM</sup>/<sub>ovarian expression TPM</sub>); negative value, highly expressed in ovary; positive value, highly expressed in testis. The greater the absolute value, the greater the expression difference between testis and ovary.

FDR: False discovery rate

Table S4. Relative bioluminescence intensity of *Cf-Foxl2* promoter transcriptional activity detected with DLR

| No                                     | Firefly luciferase RLU (F) | Renilla luciferase RLU (R) | Ratio=F/R   | Mean        |
|----------------------------------------|----------------------------|----------------------------|-------------|-------------|
| pGL3-Control                           | 10721320                   | 9802                       | 1093.789023 | 1078.387656 |
|                                        | 9908195                    | 9287                       | 1066.888662 |             |
|                                        | 11573281                   | 10771                      | 1074.485285 |             |
| pGL3-Basic                             | 11132                      | 26058                      | 0.42720086  | 0.575682737 |
|                                        | 17969                      | 23634                      | 0.760302953 |             |
|                                        | 15561                      | 28841                      | 0.539544399 |             |
| P0 (-1705/+200)                        | 48820                      | 49247                      | 0.991329421 | 1.02375612  |
|                                        | 50518                      | 47811                      | 1.05661877  |             |
|                                        | 50288                      | 49142                      | 1.023320174 |             |
| P1 (-1705/+1)                          | 62444                      | 45948                      | 1.359014538 | 1.484931233 |
|                                        | 65338                      | 42211                      | 1.54789036  |             |
|                                        | 59021                      | 38130                      | 1.547888801 |             |
| P2 (-1000/+1)/ pGL3- <i>Foxl2</i> -Luc | 88027                      | 55747                      | 1.579044612 | 1.548151089 |
|                                        | 83536                      | 54681                      | 1.527697006 |             |
|                                        | 89910                      | 58470                      | 1.537711647 |             |
| P3 (-616/+1)                           | 20464                      | 58785                      | 0.348116016 | 0.357983937 |
|                                        | 18967                      | 55264                      | 0.343207151 |             |
|                                        | 19348                      | 50566                      | 0.382628644 |             |

Table S5. Relative bioluminescence intensity of factors-*Cf-Foxl2* interaction verification detected with DLR

| Candidate transcription factors                   | Firefly luciferase<br>RLU (F) | Renilla luciferase<br>RLU (R) | Ratio=F/R   | Mean        |
|---------------------------------------------------|-------------------------------|-------------------------------|-------------|-------------|
| pGL3-Control                                      | 2648290                       | 3180                          | 832.7955975 | 878.4109929 |
|                                                   | 2208204                       | 2530                          | 872.8079051 |             |
|                                                   | 2466307                       | 2653                          | 929.6294761 |             |
| pGL3-Basic                                        | 15540                         | 27193                         | 0.571470599 | 0.537531205 |
|                                                   | 20808                         | 36754                         | 0.566142461 |             |
|                                                   | 10992                         | 23142                         | 0.474980555 |             |
| pGL3- <i>Foxl2</i> -Luc + pcDNA3.1(+)             | 18040                         | 26091                         | 0.691426162 | 0.531996217 |
|                                                   | 13808                         | 33754                         | 0.409077443 |             |
|                                                   | 11962                         | 24142                         | 0.495485047 |             |
| pGL3- <i>Foxl2</i> -Luc + pcDNA3.1- <i>Vtg</i>    | 146192                        | 187700                        | 0.778859883 | 0.796678199 |
|                                                   | 183789                        | 234755                        | 0.782897063 |             |
|                                                   | 174562                        | 210753                        | 0.828277652 |             |
| pGL3- <i>Foxl2</i> -Luc + pcDNA3.1- <i>HSDL2</i>  | 286444                        | 192996                        | 1.484196564 | 1.441310839 |
|                                                   | 278384                        | 193089                        | 1.441739302 |             |
|                                                   | 267269                        | 191180                        | 1.397996652 |             |
| pGL3- <i>Foxl2</i> -Luc + pcDNA3.1- <i>Ps</i>     | 309701                        | 240365                        | 1.288461298 | 1.178757385 |
|                                                   | 354395                        | 314568                        | 1.126608555 |             |
|                                                   | 346012                        | 308608                        | 1.121202302 |             |
| pGL3- <i>Foxl2</i> -Luc + pcDNA3.1- <i>CECR</i>   | 236407                        | 142498                        | 1.659019776 | 1.364194796 |
|                                                   | 214484                        | 170363                        | 1.258982291 |             |
|                                                   | 173440                        | 147661                        | 1.17458232  |             |
| pGL3- <i>Foxl2</i> -Luc + pcDNA3.1- <i>TRERF1</i> | 290484                        | 428726                        | 0.67755163  | 0.656071027 |
|                                                   | 345363                        | 593903                        | 0.581514153 |             |
|                                                   | 349616                        | 493009                        | 0.709147298 |             |
| pGL3- <i>Foxl2</i> -Luc + pcDNA3.1- <i>YBX</i>    | 201350                        | 113374                        | 1.775980384 | 1.865366463 |
|                                                   | 194864                        | 104200                        | 1.870095969 |             |
|                                                   | 215850                        | 110691                        | 1.950023037 |             |

|                                                |        |        |             |             |
|------------------------------------------------|--------|--------|-------------|-------------|
|                                                | 332354 | 171318 | 1.939982956 |             |
| pGL3- <i>Foxl2</i> -Luc + pcDNA3.1- <i>Uf1</i> | 319601 | 212752 | 1.502223246 | 1.595997717 |
|                                                | 285541 | 212174 | 1.345786948 |             |
|                                                | 282939 | 355519 | 0.795847761 |             |
| pGL3- <i>Foxl2</i> -Luc + pcDNA3.1- <i>Uf2</i> | 258214 | 305896 | 0.844123493 | 0.837145642 |
|                                                | 243613 | 279544 | 0.871465673 |             |
|                                                | 307425 | 208871 | 1.471841472 |             |
| pGL3- <i>Foxl2</i> -Luc + pcDNA3.1- <i>Uf3</i> | 356490 | 240575 | 1.481824795 | 1.378774313 |
|                                                | 429548 | 363206 | 1.182656674 |             |
|                                                | 238737 | 218997 | 1.090138221 |             |
| pGL3- <i>Foxl2</i> -Luc + pcDNA3.1- <i>Uf4</i> | 198985 | 232411 | 0.856177203 | 0.979669915 |
|                                                | 274749 | 276771 | 0.992694321 |             |
|                                                | 309701 | 240365 | 1.288461298 |             |
| pGL3- <i>Foxl2</i> -Luc + pcDNA3.1- <i>Uf5</i> | 354395 | 314568 | 1.126608555 | 1.178757385 |
|                                                | 346012 | 308608 | 1.121202302 |             |

---

## Figure Legends

**Figure S1.** Schematic diagram of upstream elements of *Foxl2* core promoter region of Zhikong scallop *C. farreri*

Green line, GC box; Red line, TATA box; Blue line, the octamer frame; ATG, initiation codon at +330; +1, the transcription start site (TSS).

**Figure S2.** The synthesis, purification and double-strand of cDNA

A. Capillary gel electrophoresis of *C. farreri* total RNA sample; L lane, RNA ladder; 1 lane, *C. farreri* total RNA sample; arrow, 28S rRNA band. B. the purification of mRNA from total RNA. C. the double-strand cDNA synthesized by LD-PCR.

**Figure S3.** Electropherogram of *C. farreri* total RNA sample.

The visual assessment showed the presence of prominent 28S rRNA peak on RNA sample.

**Figure S4.** The *C. farreri* gonadal Y1H library construction and quality test

A. Size distribution of full-length cDNA transgenes in the bacteria (primary) library. B. Size distribution of full-length cDNA transgenes in the yeast (secondary) library. C. Plate counting of 100-fold diluted bacteria from the *E. coli* library. D. Plate counting of 100-fold diluted yeast cells from the *S. cerevisiae* library.

**Figure S5.** The detection of CTNNB1 regulating *Cf-Foxl2* transcription by transient transfection

1: pGL3-*Foxl2-Luc* + pcDNA3.1(+); 2: pGL3-*Foxl2-Luc* + pcDNA3.1-*CTNNB1*; 3: pGL3-*Foxl2-Luc* + pcDNA3.1-*Y-box*. \*\*\*  $P < 0.001$ .

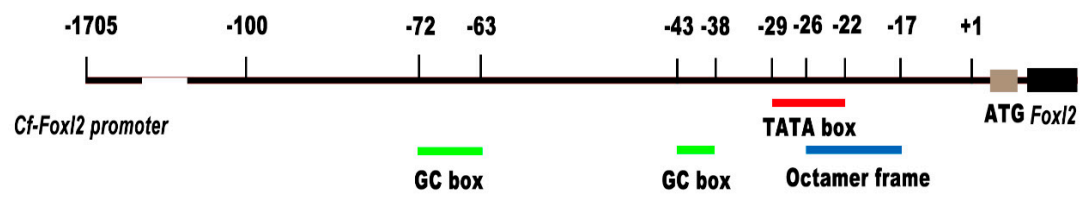

**Figure S1.**

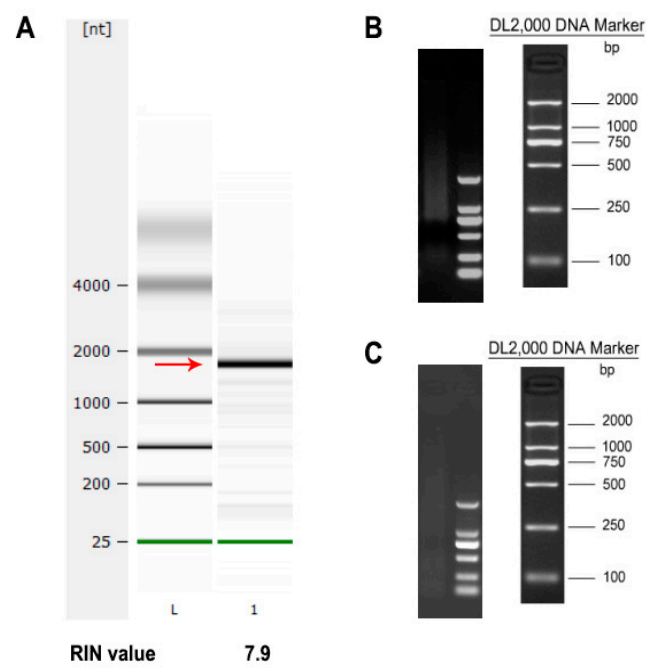

**Figure S2.**

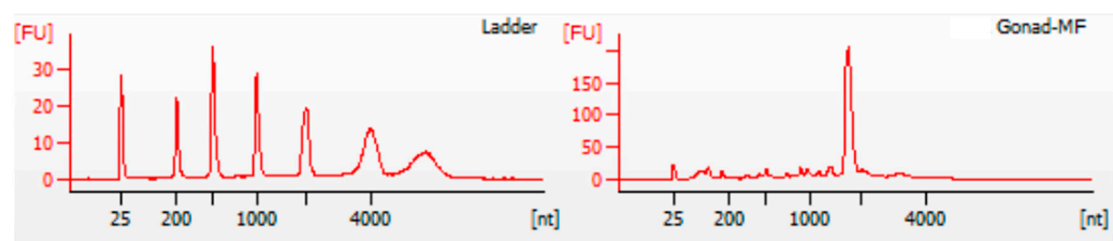

**Figure S3.**



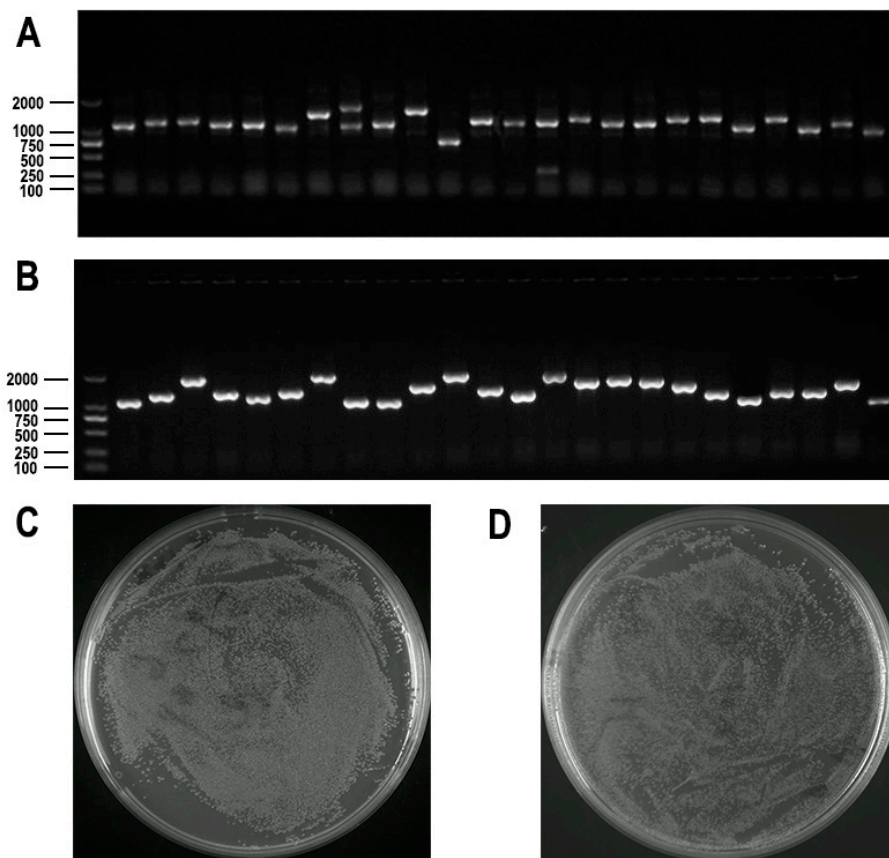

**Figure S4.**

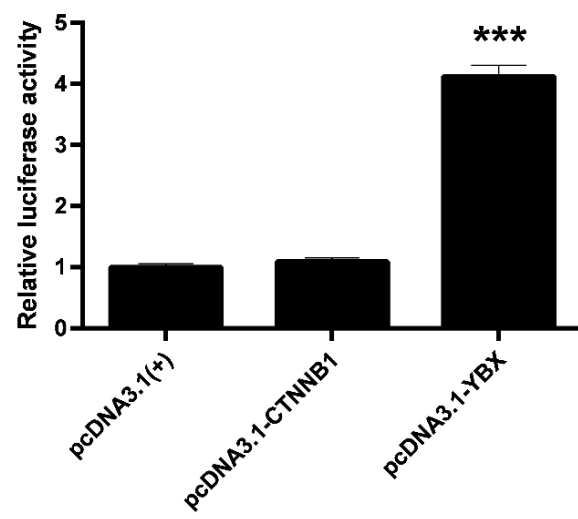

**Figure S5.**
